# Supplementary material for: Zebularine regulates early stages of mESC differentiation: effect on cardiac commitment
Source: PubMed Central journal article supplement — Cell Death Dis. 2013 Apr 4;4(4):e570–. doi: 10.1038/cddis.2013.88 (PMC3668624; doi:10.1038/cddis.2013.88), 2013-04-04
Supplement: cddis201388x4.pdf [file cddis201388x4.pdf]

### Mouse PCR Primer Sets

| <b>Gene symbol</b>                                                        | <b>Primer sequence (5'-3')</b><br><b>F: Forward, R: Reverse</b>          |
|---------------------------------------------------------------------------|--------------------------------------------------------------------------|
| <b>Actc</b><br>(actin, alpha, cardiac muscle 1)                           | F: GCC CCT AGC ACG CCT ACA G<br>R: CTC CTC GTC GTC ACA CAT CCT           |
| <b>Anf (Nppa)</b><br>(natriuretic peptide type A )                        | F: TAC AGT GCG GTG TCC AAC ACA GAT<br>R: TGA CAC ACC ACA AGG GCT TAG GAT |
| <b><math>\beta</math>-Actin (Actb)</b><br>(actin, beta )                  | F: TGT GAT GGT GGG AAT GGG TCA GAA<br>R: TGT GGT GCC AGA TCT TCT CCA TGT |
| <b>cTnI (Tnni3)</b><br>(troponin I, cardiac 3)                            | F: TCA GGA CTT ATG CCG ACA GCT TCA<br>R: TGT CCT CCT TCT TCA CCT GCT TGA |
| <b>cTnT (Tnnt2)</b><br>(troponin T2, cardiac )                            | F: AGG TTG GTC CTG ATG AAG AAG CCA<br>R: TCA TCT ATT TCC AAC GCC CGG TGA |
| <b>Flk1 (Kdr)</b><br>(kinase insert domain protein receptor)              | F: GGC GGT GGT GAC AGT ATC TT<br>R: CTC GGT GAT GTA CAC GAT GC           |
| <b>FoxD3</b><br>(forkhead box D3)                                         | F: ACT CTT ACA TCG CGC TCA TCA CCA<br>R: ATC TTG ACG AAG CAG TCG TTG AGC |
| <b>Gata4</b><br>(GATA binding protein 4)                                  | F: TCT CAC TAT GGG CAC AGC AG<br>R: GCG ATG TCT GAG TGA CAG GA           |
| <b>HPRT</b><br>(hypoxanthine guanine phosphoribosyl transferase)          | F: AGG AGT CCT GTT GAT GTT GCC AGT<br>R: GGG ACG CAG CAA CTG ACA TTT CTA |
| <b>Hrt1 (Hey1)</b><br>(hairy/enhancer-of-split related with YRPW motif 1) | F: AGT GAG CTG GAC GAG ACC AT<br>R: CTG GTA CCA GCC TTC TCA G            |
| <b>Mef2C</b><br>(myocyte enhancer factor 2C)                              | F: ACT GGG AAA CCC CAA TCT TC<br>R: ATC AGA CCG CCT GTG TTA CC           |
| <b>Myh6</b><br>(myosin, heavy polypeptide 6, non-muscle)                  | F: GGG AAG ACT GTG AAC ACA AAA CG<br>R: CTT GCT ACG GTC CCC TAT GG       |
| <b>Myh7</b><br>(myosin, heavy polypeptide 7, non-muscle)                  | F: CTA CAG GCC TGG GCT TAC CT<br>R: TCT CCT TCT CAG ACT TCC GC           |
| <b>Myl2</b><br>(myosin, light polypeptide 2, regulatory, cardiac, slow)   | F: ACA CAC ACA CAC ACA GAG GAC AGT<br>R: ACA TCG TGA GGA ACA CGG TGA AGT |
| <b>Myl7</b>                                                               | F: ATC TGA GAG TTC ACT TGG CTG CCT                                       |

|                                                                                                  |                                                                          |
|--------------------------------------------------------------------------------------------------|--------------------------------------------------------------------------|
| (myosin, light polypeptide 7, regulatory)                                                        | R: AGA ACC TCA CCA CCT TCT GGG TTT                                       |
| <b>Nkx2.5</b><br>(NK2 transcription factor related, locus 5)                                     | F: TGG GTC TCA ATG CCT ATG GCT ACA<br>R: GAC GCC AAA GTT CAC GAA GTT GCT |
| <b>Nanog</b><br>(Nanog homeobox)                                                                 | F: AAG CCA GGT TCC TTC CTT CTT CCA<br>R: AGG TCA GGA GTT CAA ATC CCA GCA |
| <b>Oct3/4 (Pou5f1)</b><br>(POU domain, class 5, transcription factor 1)                          | F: AGC TGC TGA AGC AGA AGA GGA TCA<br>R: TCT CAT TGT TGT CGG CTT CCT CCA |
| <b>Serca2 (Atp2a2)</b><br>(ATPase, Ca <sup>2+</sup> transporting, cardiac muscle, slow twitch 2) | F: CTG TGG AGA CCC TTG GTT GT<br>R: CAG AGC ACA GAT GGT GGC TA           |
| <b>Tbx5</b><br>(T-box 5)                                                                         | F: GGA GCC TGA TTC CAA AGA CA<br>R: TTC AGC CAC AGT TCA CGT TC           |
| <b>Tubulin</b><br>(tubulin, beta 2C)                                                             | F: TGC ACT TCT TCA TGC CTG GCT TTG<br>R: GCA GCC ATC ATG TTC TTG GCA TCA |
| <b>Sox17</b><br>(SRY-box containing gene 17)                                                     | F: CTT TAT GGT GTG GGC CAA AG<br>R: GGT CAA CGC CTT CCA AGA CT           |
| <b>Pdx-1</b><br>(Pancreatic and duodenal homeobox 1)                                             | F: CCC CAG TTT ACA AGC TCG CT<br>R: CTC GGT TCC ATT CGG GAA AGG          |
| <b>Brachyury</b><br>(Brachyury)                                                                  | F: GCG GAC AAT TCA TCT GCT TG<br>R: TGG GAT ACT GGC TAG AGC CA           |
| <b>Sox1</b><br>(SRY-box containing gene 1)                                                       | F: AAG GAA CAC CCG GAT TAC AAG T<br>R: GTT AGC CCA GCC GTT GAC AT        |
| <b>FoxA2</b><br>(forkhead box A2)                                                                | F: CCC TAC GCC AAC ATG AAC TCG<br>R: GTT CTG CCG GTA GAA AGG GA          |
| <b>Sox7</b><br>(SRY-box containing gene 7)                                                       | F: TGG ACA CGT ATC CCT ACG GG<br>R: TCC TGA CAT GAG GAC GAG AAG          |
| <b>Pax4</b><br>(paired box gene 4)                                                               | F: GCA GTG TGA ATC AGC TAG GGG<br>R: CAG GGT CGC ATC CCT CTT ATT         |
| <b>P48 (Ptf1a)</b><br>(pancreas specific transcription factor, 1a)                               | F: TCC CAT CCC CTT ACT TTG ATG A<br>R GTA GCA GTA TTC GTG TAG CTG G      |
| <b>Mist1 (Bhlha15)</b><br>(basic helix-loop-helix family, member a15)                            | F: GCT GAC CGC CAC CAT ACT TAC<br>R: TGT GTA GAG TAG CGT TGC AGG         |
| <b>Nkx6.1</b><br>(NK6 homeobox 1)                                                                | F: CTG CAC AGT ATG GCC GAG ATG<br>R: CCG GGT TAT GTG AGC CCA A           |

|                                                          |                                                                             |
|----------------------------------------------------------|-----------------------------------------------------------------------------|
| <b>α-SMA</b><br>(alpha 2, smooth muscle, aorta)          | F: ACG GCC GCC TCC TCT TCC TC<br>R: GCC CAG CTT CGT CGT ATT CC              |
| <b>SM22α</b><br>(SM22 alpha)                             | F: GCA GTC CAA AAT TGA GAA GA<br>R: CTG TTG CTG CCC ATT TGA AG              |
| <b>Desmin</b><br>(desmin)                                | F: TCG TAT TGA CCT GGA GCG CAG AAT<br>R: ATG TTC TTA GCC GCG ATG GTC TCA    |
| <b>BMP2</b><br>(bone morphogenetic protein 2)            | F: CTC CAC AAA CGA GAA AAG CG<br>R: CAT GCC TTA GGG ATT TTG GA              |
| <b>Noggin</b><br>(noggin)                                | F: AAG GAT CTG AAC GAG ACG<br>R: GCA GGA ACA CTT ACA CTC G                  |
| <b>Wt1</b><br>(Wilms tumor 1 homolog)                    | F: CCA GTG TAA AAC TTG TCA GCG A<br>R: TGG GAT GCT GCA CTG TCT              |
| <b>Snail</b><br>(snail homolog 1)                        | F: TCC AAA CCC ACT CGG ATG TGA AGA<br>R: TTG GTG CTT GTG GAG CAA GGA CAT    |
| <b>Slug</b><br>(Slug zinc finger protein)                | F: CAC ATT CGA ACC CAC ACA TTG CCT<br>R: TGT GCC CTC AGG TTT GAT CTG TCT    |
| <b>Otx2</b><br>(orthodenticle homeobox 2)                | F: TTT ACT AGG GCA CAG CTC GAC G<br>R: AAC CAT ACC TGC ACC CTG GAT T        |
| <b>Zic1</b><br>(zinc finger protein of the cerebellum 1) | F: CCC TAC CTT TGC AAG ATG TGC G<br>R: GGA CCT TCA TGT GTT TAC GCA G        |
| <b>Nestin</b><br>(Nestin)                                | F: CGG CCC ACG CAT CCC CCA TCC<br>R: AGC GGC CTT CCA ATC TCT GTT CC         |
| <b>BMP4</b><br>(bone morphogenetic protein 4)            | F: CTC CCA AGA ATC ATG GAC TG<br>R: AAA GCA GAG CTC TCA CTG GT              |
| <b>Ngn</b><br>(neurogenin)                               | F: CTT CAC AAG AAG TCT GAG AAC ACC AG<br>R: CTG CGC ATA GCG GAC CAC AGC TTC |
| <b>Pax6</b><br>(paired box gene 6)                       | F: GCA GAT GCA AAA GTCC CAG GTG<br>R: CAG GTT GCG AAG AAC TCT GTT T         |
| <b>Isl1</b><br>(islet 1, transcription factor)           | F: CGG AGA GAC ATG ATG GTG GTT<br>R: GGC TGA TCT ATG TCG CTT TGC            |

### Human PCR Primer Sets

| <b>Gene symbol</b>                                                                               | <b>Primer sequence (5'-3')</b><br><b>F: Forward, R: Reverse</b>          |
|--------------------------------------------------------------------------------------------------|--------------------------------------------------------------------------|
| <b>Actc1</b><br>(actin, alpha, cardiac muscle 1)                                                 | F: TGA GAC CTT CAA TGT CCC TGC CAT<br>R: TAG TGA TGA CTT GGC CAT CAG GCA |
| <b>Anf (Nppa)</b><br>(natriuretic peptide type A )                                               | F: GAA CCA GAG GGG AGA GAC AGA G<br>R: CCC TCA GCT TGC TTT TTA GGA G     |
| <b><math>\beta</math>-Actin (Actb)</b><br>(actin, beta )                                         | F: CGC ACC ACT GGC ATT GTC AT<br>R: TTC TCC TTG ATG TCA CGC AC           |
| <b>cTnI (Tnni3)</b><br>(troponin I, cardiac 3)                                                   | F: CCT GCG GAG AGT GAG GAT CT<br>R: TAG GCA GGA AGG CTC AGC TC           |
| <b>Gata4</b><br>(GATA binding protein 4)                                                         | F: CTC CCC TGG CAA AAC AAG AG<br>R: TGC CGT GTC TTA GCA GTC GT           |
| <b>Myh6</b><br>(myosin, heavy polypeptide 6, non-muscle)                                         | F: GTC ATT GCT GAA ACC GAG AAT G<br>R: GCA AAG TAC TGG ATG ACA CGC T     |
| <b>Myh7</b><br>(myosin, heavy polypeptide 7, non-muscle)                                         | F: AGA TGG ATG CTG ACC TGT CC<br>R: GGT TTT TCC TGT CCT CCT CC           |
| <b>Myl2</b><br>(myosin, light polypeptide 2, regulatory, cardiac, slow)                          | F: GGC GCG TGA ACG TGA AAA AT<br>R: CAG CAT TTC CCG AAC GTA AT           |
| <b>Myl7</b><br>(myosin, light polypeptide 7, regulatory)                                         | F: GCT CTT TGG GGA GAA GCT CA<br>R: CGT CTC CAT GGG TGA TGA TG           |
| <b>Serca2 (Atp2a2)</b><br>(ATPase, Ca <sup>2+</sup> transporting, cardiac muscle, slow twitch 2) | F: TGG GCA AAG TGT ATC GAC AGG ACA<br>R: CCG GAT CTT GCC AAT TTC GGT GTT |

### MSP Mouse Primers

| <b>Gene symbol</b>                                                                               | <b>Primer sequence (5'-3')</b><br><b>F: Forward; R: Reverse</b><br><b>M: Methylated; U: Unmethylated</b>                                                           |
|--------------------------------------------------------------------------------------------------|--------------------------------------------------------------------------------------------------------------------------------------------------------------------|
| <b>Gata4</b><br>(GATA binding protein 4)                                                         | MF: GAG ATA GGT TCG GAA ATT TGC<br>MR: CTA ATT TCC GCC GAA ATT TT<br>UF: TTG GAG ATA GGT TTG GAA ATT TGT<br>UR: CCC TAA TTT CCA CCA AAA TTT TA                     |
| <b>Nanog</b><br>(Nanog homeobox)                                                                 | MF: GAG GTT GTT AGG TTG TGT GTG TTA C<br>MR: ACT ACA CAA AAA AAC CCT ATC TCG A<br>UF: AGA GGT TGT TAG GTT GTG TGT GTT AT<br>UR: ACT ACA CAA AAA AAC CCT ATC TCA AA |
| <b>Nkx2.5</b><br>(NK2 transcription factor related, locus 5)                                     | MF: GTT TCG CGT TAT TTG TTG TC<br>MR: CGA CGC AAA TTT CAC AAC<br>UF: GGT GTT TTG TGT TAT TTG TTG TT<br>UR: CAA CAC AAA TTT CAC AAC ACC                             |
| <b>Oct3/4 (Pou5f1)</b><br>(POU domain, class 5, transcription factor 1)                          | MF: AAA AAA ACT CCT ACT ACA ACA ATC G<br>MR: TAG TGT TTG AGG TGT AGA TTT GAT C<br>UF: AAA AAC TCC TAC TAC AAC AAT CAC T<br>UR: GTG TTT GAG GTG TAG ATT TGA TTG A   |
| <b>Serca2 (Atp2a2)</b><br>(ATPase, Ca <sup>2+</sup> transporting, cardiac muscle, slow twitch 2) | MF: GAG GGG ATA GTT GTT CGC<br>MR: ACT ACG AAA ACC CCG ACC<br>UF: GGA GGG GAT AGT TGT TTG T<br>UR: ACT ACA AAA ACC CCA ACC A                                       |
| <b>Sox2</b><br>(SRY-box containing gene 2)                                                       | MF: CGG AGT GGA AAT TTT TGT TC<br>MR: ACA AAC CTC CGA AAA ACG TA<br>UF: GTG GAG TGG AAA TTT TTG TTT<br>UR: AAC AAA CCT CCA AAA ACA TA                              |

**Bisulfite sequencing PCR Primers**

| <b>Gene symbol</b>                                           | <b>Primer sequence (5'-3')</b><br><b>F: Forward; R: Reverse</b>          |
|--------------------------------------------------------------|--------------------------------------------------------------------------|
| <b>Gata4</b><br>(GATA binding protein 4)                     | F: GGG GTG TAG ATA GGA TAG TGT TTT<br>R: TCC TTT TCC AAA AAT ACA AAA AAT |
| <b>Nkx2.5</b><br>(NK2 transcription factor related, locus 5) | F: GTG TTA ATG TTT ATT TAT TAG GGG G<br>R: TTC TCC CCA AAA ATT TTT AAC T |
